1 **Risk of SARS-CoV-2 transmission by fomites: a clinical observational study in highly infectious**  
2 **COVID-19 patients**

3 *Short title: Risk of SARS-CoV-2 transmission by fomites*

4  
5 Toni Luise Meister, M.Sc. <sup>1\*</sup>, Marielen Dreisemeier, M.D. <sup>2\*</sup>, Elena Vidal Blanco <sup>1</sup>, Yannick  
6 Brüggemann, Dr. <sup>1</sup>, Natalie Heinen, M.Sc. <sup>1</sup>, Günter Kampf, Prof. <sup>3</sup>, Daniel Todt, Dr. <sup>1,4</sup>, Huu Phuc  
7 Nguyen, Prof <sup>5</sup>, Jörg Steinmann, Prof. <sup>6</sup>, Wolfgang Ekkehard Schmidt, Prof. <sup>2</sup>, Eike Steinmann, Prof. <sup>1</sup>,  
8 Daniel Robert Quast, Dr. <sup>2#</sup> and Stephanie Pfaender, Prof. <sup>1#</sup>

9  
10 <sup>1</sup> Department for Molecular & Medical Virology, Ruhr-University Bochum, 44801 Bochum, Germany

11 <sup>2</sup> Department of Medicine I, St. Josef-Hospital Bochum, Ruhr-University Bochum, 44791 Bochum,  
12 Germany

13 <sup>3</sup> Institute for Hygiene and Environmental Medicine, University Medicine Greifswald, 17475  
14 Greifswald, Germany

15 <sup>4</sup> European Virus Bioinformatics Center (EVBC), 07743 Jena, Germany

16 <sup>5</sup> Department of Human Genetics, Ruhr-University Bochum, 44791 Bochum, Germany

17 <sup>6</sup> Institute of Clinical Hygiene, Medical Microbiology and Infectiology, Paracelsus Medical University,  
18 Nuremberg, Germany

19  
20 \* These authors contributed equally and share first authorship.

21 # These authors contributed equally and share last authorship.

22  
23 Funding: None.

24 Word count: Abstract: 227; Text: 3049

25 Corresponding author:

26 Jr.-Prof. Dr. Stephanie Pfänder

27 Department for Molecular & Medical Virology, Ruhr-University Bochum, 44801 Bochum, Germany

28 Phone: +49 234 32 – 29278

29 E-Mail: stephanie.pfaender@ruhr-uni-bochum.de

30 **Abstract**

31 Background:

32 The contribution of droplet-contaminated surfaces for virus transmission has been discussed  
33 controversially in the context of the current Severe Acute Respiratory Syndrome Coronavirus-2 (SARS-  
34 CoV-2) pandemic. Importantly, the risk of fomite-based transmission has not been systematically  
35 addressed.

36 Methods:

37 We initiated this single-center observational study to evaluate whether hospitalized COVID-19 patients  
38 can contaminate stainless steel carriers by coughing or intensive moistening with saliva and to assess  
39 the risk of SARS-CoV-2 transmission upon detection of viral loads and infectious virus in cell culture.  
40 Fifteen hospitalized patients with a high baseline viral load (CT value  $\leq 25$ ) shortly after admission were  
41 included. We documented clinical and laboratory parameters and used patient samples to perform virus  
42 culture, quantitative PCR and virus sequencing.

43 Results:

44 Nasopharyngeal and oropharyngeal swabs of all patients were positive for viral RNA on the day of the  
45 study. Infectious SARS-CoV-2 could be isolated from 6 patient swabs (46.2 %). While after coughing,  
46 no infectious virus could be recovered, intensive moistening with saliva resulted in successful viral  
47 recovery from steel carriers of 5 patients (38.5 %).

48 Conclusions:

49 Transmission of infectious SARS-CoV-2 via fomites is possible upon extensive moistening, but unlikely  
50 to occur in real-life scenarios and from droplet-contaminated fomites.

51

52

53

54 Registration: None.

55 Keywords: Coronavirus, SARS-CoV-2, COVID-19, fomites, surfaces, cough,  
56 transmission, environmental stability

## 57 **Background**

58 The emergence of Severe Acute Respiratory Syndrome Coronavirus-2 (SARS-CoV-2), the cause of the  
59 Coronavirus Disease-19 (COVID-19), has raised the general awareness towards different hygiene and  
60 prevention measures to limit viral spread. Although SARS-CoV-2 is mainly transmitted via respiratory  
61 droplets and aerosols exhaled from infected individuals (e.g., upon breathing, speaking, coughing or  
62 sneezing [1]), droplet-contaminated surfaces (fomites) have also been widely perceived as another  
63 potential route of transmission. In particular, different studies reported that SARS-CoV-2 can persist on  
64 inanimate surfaces for days under controlled laboratory conditions [2–4] and genomic material of  
65 SARS-CoV-2 has been detected on diverse surfaces and materials in hospital, private and public settings  
66 [5]. Consequently, a clinically significant risk of SARS-CoV-2 transmission by fomites has been  
67 assumed and extensive hand hygiene and disinfection procedures have been initiated early during the  
68 pandemic worldwide. Although recent studies suggest a low risk of viral transmission by fomites for  
69 most instances [1,6], it is still considered possible given a timely order of events (e.g., direct  
70 contamination of a surface by an infected individual followed by timely skin contact by another  
71 individual and direct contact towards susceptible mucosae) [7]. However, most efforts to study surface  
72 transmission of SARS-CoV-2 have either focused on the detection of viral RNA via RT-qPCR rather  
73 than direct detection of infectious viral particles and/or employed lab-grown viruses which do not  
74 recapitulate the specific infectivity of patient-derived SARS-CoV-2 particles. Consequently, these  
75 findings do not necessarily allow to adequately estimate the potential of SARS-CoV-2 transmission  
76 from directly contaminated surfaces.

77 To examine the risk of transmission by surfaces directly after contamination by individuals infected  
78 with SARS-CoV-2, we performed a clinical observational study, including hospitalized patients with  
79 high viral loads ( $CT \leq 25$ , up to  $2.03 \times 10^9$  RNA copies). The aim of this study was to evaluate if  
80 confirmed hospitalized COVID-19 patients can contaminate stainless steel carriers by coughing or  
81 intensive moistening with saliva and to assess the risk of SARS-CoV-2 transmission upon detection of  
82 viral loads and infectious virus in cell culture.

83 **Methods**

84 *Study cohort.*

85 Hospitalized patients (age > 18 years) treated at St. Josef-Hospital Bochum, Germany, with confirmed  
86 SARS-CoV-2 infection with a high virus load (RT-PCR from combined nasopharyngeal and  
87 oropharyngeal swab (swab) with a cycle threshold (CT)  $\leq 25$  on admission) were included in this study.  
88 The initial viral load was determined using Allplex™ 2019-nCoV Assay (Seegene Inc., Seoul, Republic  
89 of Korea) targeting three SARS-CoV-2 specific genes (E gene, RdRP gene and N gene) with a sensitivity  
90 of 100 copies per run. Exclusion criteria were acute myocardial infarction, current need of ventilation  
91 support systems (e.g., high flow- or non-invasive ventilation), current treatment in an intensive care unit,  
92 evidence of drug or alcohol abuse, acute psychiatric disorders and any clinical or mental disorder that  
93 might deteriorate the patient's condition during the standardized procedure of sampling (such as  
94 dysphagia), as per investigator's judgement. Collected clinical data included medical history, current  
95 daily medication, laboratory results, blood gas analysis, and results of x-rays or computed tomography  
96 (to define the "clinical classification of COVID-19-infection" following the recommendation of the  
97 World Health Organization (WHO) [8] and Robert Koch Institute (RKI) [9]).

98

99 *Study design.*

100 After written informed consent, two combined nasopharyngeal and oropharyngeal swabs were collected  
101 from each patient. Then, patients were asked to forcefully cough two-times on a pre-defined surface  
102 area containing nine standardized steel-carriers, each with a one-centimeter diameter ("cough"), using  
103 a specially designed tripod with a defined distance of 15 centimeters (Appendix Figure 1). In addition,  
104 patients were asked to moisten nine steel carriers with saliva for ten seconds within their mouth  
105 ("moisten"). After defined time points at room temperature (1 min, 5 min, 15 min, 30 min, 45 min, 90  
106 min, 120 min and 240 min), the steel-carriers were placed in containers containing 2 mL cold Dulbecco's  
107 modified Eagle's medium (DMEM complete, supplemented with 10 % (v/v) fetal calf serum, 1 % non-  
108 essential amino acids, 100 IU/mL penicillin, 100 µg/mL streptomycin and 2 mM L-Glutamine) and  
109 transported on ice to the biosafety level three laboratory of the Ruhr-University Bochum. The study was  
110 conducted between November 2020 and April 2021.

111 *Virus culture.*

112 VeroE6 cells were seeded at  $3 \times 10^5$  cells/well in a six well cell culture plate and incubated for at least  
113 four hours at 37 °C and 5 % CO<sub>2</sub>. Hereafter, the medium was replaced with 1·8 mL of patient swabs,  
114 “cough” samples or “moisten” samples and 2·5 µg/mL amphotericin B was added. Over a maximum  
115 period of ten days, cells were monitored daily for the appearance of a cytopathic effect (CPE), indicating  
116 productive virus infection. Upon visible CPE, cells were harvested for RT-qPCR and the supernatant  
117 (SN) was collected for viral titration and RT-qPCR. Viral titers in the SN were quantified by endpoint-  
118 dilution and the 50 % tissue culture infective dose (TCID<sub>50</sub>/mL), calculated according to Spearman and  
119 Kärber [10].

120

121 *Reverse Transcription Quantitative PCR (RT-qPCR).*

122 SARS-CoV-2 RNA was isolated from the supernatant using AVL buffer and the QIAamp Viral RNA  
123 Kit (QIAGEN®, www.qiagen.com) according to the manufacturer’s instructions. RNA was directly  
124 subjected to one-step quantitative PCR (RT-qPCR) running a GoTaq Probe 1-Step RT-qPCR System  
125 (Promega®, www.promega.com). Total RNA was purified from VeroE6 cells using the RNeasy Mini  
126 Kit (QIAGEN®, www.qiagen.com). Subsequently, 500 ng of total RNA were reverse transcribed using  
127 the PrimeScript™ RT Master Mix (Takara®, www.takarabio.com) and subjected to two-step RT-qPCR  
128 running a GoTaq Probe 2-Step RT-qPCR System (Promega®, www.promega.com). RT-qPCR was  
129 performed as described previously [11] using a light cycler LC480 to quantify the M-Gene abundance.

130

131 *Data analysis and sample size.*

132 Clinical patient parameters are expressed as mean ± SD or n (% of total). Results are expressed as means  
133 (± SEM). Clinical characteristics were screened for correlations using Spearman’s correlation  
134 coefficient. Statistical significance was defined as  $\alpha=0\cdot05$ . Statistical analysis was performed using  
135 GraphPad Prism version 8.0.0 for Windows (GraphPad Software, San Diego, California USA,  
136 www.graphpad.com). Sample size calculation was performed using G\*Power Version 3.1.9.6 for  
137 windows [12].

138

139 *Legal and ethical considerations.*

140 The study was conducted according to the revised principles of the Declaration of Helsinki and was  
141 approved by the ethics committee of the Ruhr-University Bochum (registration number 20-7065) in  
142 November 2020. All patients gave written informed consent.

143

144 *Sequencing and strain assignment*

145 RNA of the initial swaps was isolated using the NucleoSpin RNA kit (Macherey & Nagel) followed by  
146 a reverse transcription utilizing the SuperScript IV together with Oligo dT and random hexamer primer  
147 (Thermo Fisher) according to the manufacturers' instructions. Subsequently, the cDNA was subjected  
148 to deep sequencing. Sequencing libraries were prepared from 4-5µl cDNA using NEBNext® ARTIC  
149 SARS-CoV-2 Library Prep Kit for Illumina sequencing platforms (New England BioLabs® Inc.,  
150 neb.com, catalog #E7650). Concentration and size of the cDNA amplicons and libraries were assessed  
151 using Qubit fluorometer and Tapestation (High Sensitivity D1000 ScreenTape), respectively. High  
152 throughput paired end sequencing was performed using Illumina MiSeq sequencer and MiSeq Reagent  
153 Kit v2 (500-cycles) following the manufacturer's recommendations. Raw reads were quality checked,  
154 trimmed and mapped to the SARS-CoV-2 reference sequence (NCBI Reference Sequence: NC\_045512)  
155 using QIAGEN CLC Genomics Workbench 21.0.5. After removing duplicates, partially full length  
156 consensus sequences were extracted and samples were assigned to respective lineages using the pangolin  
157 tool [13] (Table 2). In addition, variants in spike domains were identified and annotated using Geneious  
158 prime 2021.2.2 (<https://www.geneious.com>).

159

160 **Results**

161 *Study cohort.*

162 A total of 15 patients (33.3 % female) between 39 and 89 years (mean age 70.5 ( $\pm$  12.5) years) were  
163 recruited. Baseline parameters including laboratory findings on admission are presented in Table 1. All  
164 study patients had risk factors for a severe course of COVID-19 according to the criteria of the WHO  
165 [8] and RKI [14]. Three (20 %) patients had up to two risk factors, while most patients had multiple risk  
166 factors for a severe COVID-19 illness (3-4 risk factors: 7 (46.7 %), 5-6 risk factors: 2 (13.3 %), >6 risk  
167 factors: 1 (6.7 %)). Body temperature on admission was 37.0 ( $\pm$  -0.9) °C. On the study day, 9 (60 %)  
168 patients were categorized with a mild COVID-19 disease according to STACOB criteria (adaptation  
169 following the WHO Therapeutics and COVID-19:living guideline [8]). Nasal oxygen support was  
170 required by seven (46.7 %) patients. Mean peripheral oxygen saturation on admission was 93.4 % (SEM  
171  $\pm$  7.4 %). None of the included patients were vaccinated against SARS-CoV-2.

172 On the day of the study, most patients had only mild symptoms (n= 9/15, 60 %) and were categorized  
173 to mild COVID-19 disease. Follow-up revealed a clinical worsening in 10 patients and 3 died (2 patients  
174 died of COVID-19, 1 patient died with COVID-19). Consistent with literature [15], a high level of  
175 lactate dehydrogenase ( $r=0.53$ ,  $p=0.044$ ), leucocytes ( $r=0.69$ ,  $p=0.0056$ ), but also C-reactive protein  
176 ( $r=0.54$ ,  $p=0.035$ ) on admission was significantly correlated with a more severe COVID-19 infection  
177 (Appendix Figure 2). No significant correlation was found for COVID-19 severeness and other  
178 described severeness predictors including age ( $r=0.44$ ,  $p=0.11$ ), alanine aminotransferase ( $r=-0.31$ ,  
179  $p=0.26$ ), aspartate aminotransferase ( $r=0.07$ ,  $p=0.81$ ), procalcitonin ( $r=0.53$ ,  $p=0.47$ ), or D-dimers  
180 ( $r=0.45$ ,  $p=0.11$ ).

181

182 *SARS-CoV-2 viral load and sequencing.*

183 The patients' viral load before sample acquisition as determined with the combined nasopharyngeal and  
184 oropharyngeal swabs are displayed in Table 2. Mean CT-values in RT-qPCR analyses were E-Gene  
185 15.3 (SEM  $\pm$  2.7), S-Gene 18.1 (SEM  $\pm$  4.9) RdRP-Gene 17.2 (SEM  $\pm$  3.7) and N-Gene 19.4 (SEM  $\pm$   
186 5.5). Viral variants included supposed wildtype (n=10, 66.7 %), variant of concern (VoC) Alpha (n=4,  
187 26.7 %) and VoC Beta (n=1, 6.7 %). Deep sequencing using the pangolin tool [13] confirmed lineage

188 assignment for 14/15 (93.3 %) samples for nearly full-length genomes. Variant patterns identified by  
189 detailed investigation of spike domains underlined lineage assignment according to RKI variant reports  
190 [16] (Figure 1, Table 2).

191 Two patient samples were excluded from the study due to bacterial/fungal contamination within the  
192 cultures (Appendix Table 1). Viral RNA could be detected from all (n=13/13) combined nasopharyngeal  
193 and oropharyngeal swabs (inoculum) and viral RNA could be successfully detected within the  
194 inoculated cell cultures (Figure 2, Appendix Figure 3). After inoculation with the “swabs”, viral loads  
195 in the cells ranged from  $2.23 \times 10^1$  to  $2.03 \times 10^9$  RNA copies/50 ng and in the supernatant from not  
196 detectable to  $6.58 \times 10^7$  RNA copies/mL (Appendix Table 1). Infectious virus (“Infectivity”), determined  
197 as TCID<sub>50</sub>/mL, could be recovered from the nasal-oropharyngeal swabs from n=6/13 (46.2 %) patients  
198 (Figure 2; P1, P2, P3, P5, P8, P10). Of note, despite inclusion criteria defining a high viral load (CT ≤  
199 25, Table 2), some patients displayed lower viral loads at the time-point of the study, with none of the  
200 swab samples resulting in productive virus infection in cell culture (Appendix Figure 3; P.11, P12, P13,  
201 P14).

202

### 203 *Evaluation of SARS-CoV-2 transmission risk.*

204 Steel-carriers contaminated via intensive moistening with saliva (Figure 2, “moisten”) resulted in a  
205 visible CPE and detectable viral RNA within the cells (at least one time point positive) in n=6/13 (46.2  
206 %) cases (P1, P2, P3, P5, P9, P10). Despite the absence of a visible CPE in patient 6 and patient 10  
207 (Figure 2, time points 30 and 45 min), viral RNA was detected in the cells and supernatants, and  
208 infectious virus was quantified, indicating that harvesting might have been too early for the appearance  
209 of CPE. Infectious virus was recovered from n=5/13 (38.5 %) contaminated steel carriers (Figure 2;  
210 “SN infectivity” P1, P3, P5, P6, P10) with viral titers ranging from  $5.59 \times 10^1$  to  $8.68 \times 10^5$  TCID<sub>50</sub>/mL.  
211 In some patients, infectious virus could be recovered from the steel-carriers for up to 240 min after  
212 incubation at room temperature (Figure 2; P1, P3, P5), underlining the environmental stability of SARS-  
213 CoV-2 over several hours. For other samples (Figure 2; P2, P6, P10), infectious virus could be recovered  
214 at early time points only (1 min, 15 min, 30 min, 45 min).



215 After contamination with coughing, viral RNA could be weakly detected within five of the cellular  
216 samples (Figure 2; “cough” P1, P7, P8, P10, Appendix Figure 3; P11). However, none of the via  
217 coughing contaminated surfaces resulted in productive cellular infection as determined by the  
218 appearance of CPE and quantification of infectivity (Figure 2, Appendix Figure 3).

219

## 220 **Discussion**

221 While respiratory droplets and aerosols exhaled from infected individuals are currently considered the  
222 main route of SARS-CoV-2 transmission, the role of droplet-contaminated surfaces (fomites) as a  
223 potential source of infection remains controversial. Fomite-based transmission has been proposed to  
224 contribute to the spread of other common respiratory pathogens [17,18], including experimental studies  
225 examining the transfer of infectious influenza viruses and/or respiratory syncytial virus between hands  
226 and surfaces [19]. However, current evidence points towards a low risk of SARS-CoV-2 transmission  
227 in this scenario [1,20], requiring a timely order of specific events [7]. To examine this potential risk of  
228 SARS-CoV-2 surface transmission, we assessed the amount of SARS-CoV-2 genomic material and  
229 infectious viral particles after contamination by individuals infected with SARS-CoV-2 over time. The  
230 results of the present study highlight that viral contamination via coughing on surfaces does not represent  
231 a major risk of transmission.

232 Our study cohort was characterized by non-vaccinated, hospitalized, mostly elderly patients with  
233 multiple comorbidities. Since the vaccination program in Germany started in December 2020 (during  
234 the study period), none of the patients were vaccinated against SARS-CoV-2. This cohort may therefore  
235 be quite representative for hospitalized patients during the first and second COVID-19 wave in most  
236 countries [21]. However, since the proportion of unvaccinated people in the population remains  
237 significant [22] and completely vaccinated individuals can still be infected and often present with high  
238 viral loads [23], the present results remain of significant importance for the ongoing pandemic. Initially,  
239 we were able to recruit patients in early stages of COVID-19 due to outbreaks in hospitals and  
240 rehabilitation facilities and subsequently early referral to the isolation ward. Later, patients were  
241 diagnosed in ambulatory settings and predominantly admitted via the emergency department, often only  
242 when clinical conditions deteriorated and ambulatory management failed. The hospitalized cohort may

243 explain the high rate of risk factors and, consequently, follow-up mortality in the present study.  
244 However, the present cohort is characterized by high viral load. Hence, a high transmission rate can be  
245 assumed [24], supporting the main conclusion of the study. Of note, several laboratory parameters on  
246 admission significantly correlated with a severe outcome. However, the present study was not powered  
247 for this analysis and therefore, these correlations need to be considered exploratory.

248 Infectious virus could be recovered from the combined nasopharyngeal and oropharyngeal swabs and  
249 steel-carriers contaminated via intensive “moistening” from a significant number of patients. For some  
250 patients, infectious virus could be recovered for up to 240 min (Figure 2). This demonstrates that  
251 infectious virus can be transferred from saliva by moistening onto surfaces from patients and can be  
252 recovered for several hours. As described previously, we did not observe differences of the viral stability  
253 between the wildtype and VoCs (Alpha and Beta), implying a comparable environmental stability [25].

254 The stability of SARS-CoV-2 on surfaces is likely determined by a combination of factors, including  
255 the initial amount of infectious virus deposited, possible presence of antibodies within the sputum and  
256 environmental parameters. Given the controlled laboratory conditions for virus recovery as herein  
257 presented (e.g., large inoculums, small surface area, no UV exposure), the viral survival observed might  
258 therefore differ from real-life scenarios, necessitating careful interpretation. For example, a recent study  
259 observed a low transfer efficiency between different surfaces and fingertips following an initial drying  
260 of an inoculum with a low viral titer ( $1 \times 10^4$  TCID<sub>50</sub>/mL) [20]. Hence, even if sufficient viable virus is  
261 deposited on a surface, a timely contact and high transfer efficiency are required to transfer an infectious  
262 dose, which subsequently needs to be exposed towards susceptible tissues (e.g., mucosa, eyes).

263 Importantly, we did not observe the recovery of infectious virus after patients coughed onto a surface,  
264 implying that droplet-contamination of surfaces does not present a major transmission route for SARS-  
265 CoV-2. Given that non-hospitalized and pre-symptomatic, asymptomatic, and mildly symptomatic  
266 individuals across different age groups frequently display viral loads within a comparable range [26],  
267 similar observations as herein observed for elderly and hospitalized patients can be inferred.

268 Our study encompasses several limitations. Patients were encouraged to forcefully cough twice to  
269 contaminate surfaces. However, we cannot exclude that potentially repeated coughing over a prolonged  
270 time results in a more effective virus transfer compared to our controlled conditions. Moreover, sneezing

271 can produce significantly more infectious droplets potentially containing infectious particles, therefore,  
272 we cannot exclude potential transmissions via other this route. Furthermore, a selection bias cannot be  
273 excluded, and the included patients are not demographically representative. Strengths of the present  
274 study include the high viral load of the patients included, a standardized protocol for sample acquisition,  
275 laboratory procedures and the inclusion of VoC.

276

## 277 **Conclusion**

278 The present study provides evidence that fomites may not be as critical in the transmission of SARS-  
279 CoV-2 as initially suspected. However, the present study also provides evidence that infectious SARS-  
280 CoV-2 can be found on some fomites after contamination with extensive amounts of saliva. Therefore,  
281 common hygiene practices (e.g., coughing/sneezing into elbows, hand hygiene) should still be  
282 considered to avoid the surface contamination and virus transfer. Face masks may further mitigate the  
283 risk of fomite transmission. Collectively, our findings suggest that fomites contaminated with  
284 coughing are unlikely to be an important source of SARS-CoV-2 transmission.

285

286 **Declarations**

287 *Ethics approval and consent to participate*

288 The study was conducted according to the revised principles of the Declaration of Helsinki and was  
289 approved by the ethics committee of the Ruhr-University Bochum (registration number 20-7065) in  
290 November 2020. All patients gave written informed consent.

291

292 *Consent for publication*

293 The study is published with patients consent.

294

295 *Availability of data and materials*

296 The datasets used and/or analyzed during the current study are available from the corresponding author  
297 on reasonable request.

298

299 *Competing Interests*

300 The authors declare no competing interests.

301

302 *Funding*

303 E.S was supported by the VIRus ALliance NRW (VIRAL) from Ministry of Culture and Science of the  
304 State of North Rhine-Westphalia (323-8.03-151826).

305

306 *Author Contributions*

307 Conceptualization, T.L.M., M.D., W.E.S., E.S., D.R.Q., S.P.

308 Methodology, T.L.M., M.D., D.R.Q., S.P.

309 Investigation, T.L.M., M.D., E.V., N.H.

310 Writing –Original Draft, S.P., Y.B.

311 Writing –Review & Editing, T.L.M., M.D., E.V., N.H., G.K., D.T., H.P.N., J.S., W.E.S., E.S., D.R.Q.,

312 S.P.

313 Visualization, T.L.M., D.T., S.P.

314 Resources, W.E.S., E.S., D.R.Q., S.P.

315 Supervision, D.R.Q., S.P.

316

317 *Acknowledgements*

318 We would like to thank all members of the Molecular and Medical Virology at the Ruhr-University

319 Bochum for their support and fruitful discussions. Furthermore, we are grateful for the support of the

320 healthcare workers at St. Josef-Hospital Bochum and appreciate all patients who volunteered to

321 participate in this study.

322 **References**

- 323 1. Wang CC, Prather KA, Sznitman J, et al. Airborne transmission of respiratory viruses. *Science*  
324 **2021**; 373.
- 325 2. Kratzel A, Steiner S, Todt D, et al. Temperature-dependent surface stability of SARS-CoV-2. *J*  
326 *Infect* **2020**; 81:452–82.
- 327 3. van Doremalen N, Bushmaker T, Morris DH, et al. Aerosol and Surface Stability of SARS-CoV-  
328 2 as Compared with SARS-CoV-1. *N Engl J Med* **2020**; 382:1564–7.
- 329 4. Chin A, Chu J, Perera M, et al. Stability of SARS-CoV-2 in different environmental conditions.  
330 *The Lancet Microbe* **2020**; 1.
- 331 5. Kampf G, Brüggemann Y, Kaba HEJ, et al. Potential sources, modes of transmission and  
332 effectiveness of prevention measures against SARS-CoV-2. *J Hosp Infect* **2020**; 106:678–97.
- 333 6. Centers of Disease Control and Prevention. Science Brief: SARS-CoV-2 and Surface (Fomite)  
334 Transmission for Indoor Community Environments **2021**. Available at:  
335 [https://www.cdc.gov/coronavirus/2019-ncov/more/science-and-research/surface-](https://www.cdc.gov/coronavirus/2019-ncov/more/science-and-research/surface-transmission.html)  
336 [transmission.html](https://www.cdc.gov/coronavirus/2019-ncov/more/science-and-research/surface-transmission.html).
- 337 7. Goldman E. Exaggerated risk of transmission of COVID-19 by fomites. *The Lancet Infectious*  
338 *Diseases* **2020**; 20:892–3.
- 339 8. Who Headquarters. Therapeutics and COVID-19: living guideline. World Health Organization  
340 **2021**.
- 341 9. Ständiger Arbeitskreis der Kompetenz- und Behandlungszentren für Krankheiten durch  
342 hochpathogene Erreger. Hinweise zu Erkennung, Diagnostik und Therapie von Patienten mit  
343 COVID-19 **2020**.
- 344 10. Wulff NH, Tzatzaris M, Young PJ. Monte Carlo simulation of the Spearman-Kaerber TCID50. *J*  
345 *Clin Bioinform* **2012**; 2:5.
- 346 11. Toptan T, Hoehl S, Westhaus S, et al. Optimized qRT-PCR Approach for the Detection of Intra-  
347 and Extra-Cellular SARS-CoV-2 RNAs. *Int J Mol Sci* **2020**; 21.

- 348 12. Faul F, Erdfelder E, Lang A-G, Buchner A. G\*Power 3: a flexible statistical power analysis  
349 program for the social, behavioral, and biomedical sciences. *Behavior Research Methods* **2007**;  
350 39:175–91.
- 351 13. O'Toole Á, Scher E, Underwood A, et al. Assignment of epidemiological lineages in an emerging  
352 pandemic using the pangolin tool. *Virus Evolution* **2021**; 7:veab064.
- 353 14. Robert Koch Insitut. Epidemiologischer Steckbrief zu SARS-CoV-2 und COVID-19 **2021**.  
354 Available at: [https://www.rki.de/DE/Content/InfAZ/N/Neuartiges\\_Coronavirus/Steckbrief.html](https://www.rki.de/DE/Content/InfAZ/N/Neuartiges_Coronavirus/Steckbrief.html).
- 355 15. Zhang JJY, Lee KS, Ang LW, Leo YS, Young BE. Risk Factors for Severe Disease and Efficacy  
356 of Treatment in Patients Infected With COVID-19: A Systematic Review, Meta-Analysis, and  
357 Meta-Regression Analysis. *Clinical Infectious Diseases* **2020**; 71:2199–206.
- 358 16. Robert Koch- Institut. Bericht zu Virusvarianten von SARS-CoV-2 in Deutschland (Stand:  
359 07.07.2021). Available at:  
360 [https://www.rki.de/DE/Content/InfAZ/N/Neuartiges\\_Coronavirus/DESH/Bericht\\_VOC\\_2021-](https://www.rki.de/DE/Content/InfAZ/N/Neuartiges_Coronavirus/DESH/Bericht_VOC_2021-07-07.pdf?__blob=publicationFile)  
361 [07-07.pdf?\\_\\_blob=publicationFile](https://www.rki.de/DE/Content/InfAZ/N/Neuartiges_Coronavirus/DESH/Bericht_VOC_2021-07-07.pdf?__blob=publicationFile).
- 362 17. Kraay ANM, Hayashi MAL, Hernandez-Ceron N, et al. Fomite-mediated transmission as a  
363 sufficient pathway: a comparative analysis across three viral pathogens. *BMC Infect Dis* **2018**;  
364 18:540.
- 365 18. Boone SA, Gerba CP. Significance of fomites in the spread of respiratory and enteric viral disease.  
366 *Appl Environ Microbiol* **2007**; 73:1687–96.
- 367 19. Leung NHL. Transmissibility and transmission of respiratory viruses. *Nat Rev Microbiol* **2021**;  
368 19:528–45.
- 369 20. Todt D, Meister TL, Tamele B, et al. A realistic transfer method reveals low risk of SARS-CoV-  
370 2 transmission via contaminated euro coins and banknotes. *iScience* **2021**; 24:102908.
- 371 21. Mikami T, Miyashita H, Yamada T, et al. Risk Factors for Mortality in Patients with COVID-19  
372 in New York City. *J GEN INTERN MED* **2021**; 36:17–26.
- 373 22. Tram KH, Saeed S, Bradley C, et al. Deliberation, Dissent, and Distrust: Understanding distinct  
374 drivers of COVID-19 vaccine hesitancy in the United States. *Clinical Infectious Diseases* **2021**.

- 375 23. Butt AA, Nafady-Hego H, Chemaitelly H, et al. Outcomes Among Patients with Breakthrough  
376 SARS-CoV-2 Infection After Vaccination. *Int J Infect Dis* **2021**; 110:353–8.
- 377 24. Meyerowitz EA, Richterman A, Gandhi RT, Sax PE. Transmission of SARS-CoV-2: A Review  
378 of Viral, Host, and Environmental Factors. *Ann Intern Med* **2021**; 174:69–79.
- 379 25. Meister TL, Fortmann J, Todt D, et al. Comparable environmental stability and disinfection  
380 profiles of the currently circulating SARS-CoV-2 variants of concern B.1.1.7 and B.1.351. *J*  
381 *Infect Dis* **2021**.
- 382 26. Jones TC, Biele G, Mühlemann B, et al. Estimating infectiousness throughout SARS-CoV-2  
383 infection course. *Science* **2021**; 373:eabi5273.
- 384 27. Levey AS, Stevens LA, Schmid CH, et al. A new equation to estimate glomerular filtration rate.  
385 *Ann Intern Med* **2009**; 150:604–12.
- 386 28. McWilliam H, Li W, Uludag M, et al. Analysis Tool Web Services from the EMBL-EBI. *Nucleic*  
387 *Acids Research* **2013**; 41:W597-600.
- 388 29. Dereeper A, Guignon V, Blanc G, et al. Phylogeny.fr: robust phylogenetic analysis for the non-  
389 specialist. *Nucleic Acids Research* **2008**; 36:W465-9.
- 390 30. Kumar S, Stecher G, Li M, Knyaz C, Tamura K. MEGA X: Molecular Evolutionary Genetics  
391 Analysis across Computing Platforms. *Molecular Biology and Evolution* **2018**; 35:1547–9.
- 392



**Table 1: Baseline parameters including laboratory findings of the study group**

| Parameter                    | Unit                      | Normal range  | Result               |
|------------------------------|---------------------------|---------------|----------------------|
| Participants                 | n                         | n/a           | 15                   |
| Age                          | years                     | n/a           | 70.5 (± 12.3)        |
| Male / female (% female)     | n                         | n/a           | 10/5 (33.3 %)        |
| BMI                          | kg/m <sup>2</sup>         |               | 28.8 (± 6.0)         |
| Arterial hypertension        | n                         | n/a           | 10 (66.7 %)          |
| - ACE inhibitors             | n                         | n/a           | 3 (20 %)             |
| Dyslipidemia                 | n                         | n/a           | 5 (33.3 %)           |
| Diabetes mellitus            | n                         | n/a           | 5 (33.3 %)           |
| Currently smoking            | n                         | n/a           | 8 (53.3 %)           |
| Family history of CVD        | n                         | n/a           | 4 (26.7 %)           |
| Immunosuppression            | n                         | n/a           | 5 (33.3 %)           |
| Active malignancy            | n                         | n/a           | 4 (26.7 %)           |
| Chronic pulmonary disease    | n                         | n/a           | 7 (46.7 %)           |
| Chronic renal disease        | n                         | n/a           | 3 (20 %)             |
| Leucocytes                   | /μl                       | 4600-9500     | 6182.7 (± 3560.0)    |
| Hemoglobin                   | g/dl                      | 14.0-18.0     | 11.5 (± 2.6)         |
| Thrombocytes                 | /μl                       | 150000-400000 | 175933.3 (± 64077.5) |
| D-dimers                     | μg/ml                     | <0.5          | 1.3 (± 0.9)          |
| Lactate dehydrogenase        | U/l                       | 135-225       | 250 (± 63)           |
| eGFR                         | ml/min/1.73m <sup>2</sup> | >90           | 63.4 (± 26.4)        |
| Procalcitonin                | ng/ml                     | <0.5          | 33.5 (± 124.9)       |
| C-reactive protein           | mg/l                      | <5.0          | 41.8 (± 38.9)        |
| pH                           |                           | 7.35-7.45     | 7.4 (± 0.1)          |
| Bicarbonate                  | mmol/l                    | 22-26         | 26.1 (± 4.3)         |
| Peripheral oxygen saturation | %                         | ≥95           | 93.4 (± 7.4)         |
| Air Temperature              | °C                        | n/a           | 5.5 (± 5.5)          |
| Air humidity                 | %                         | n/a           | 72.8 (± 18.7)        |

Data are presented as n (% of total) or mean (± SD). Risk factors for severe COVID-19 were defined as age > 50 years, male sex, smokers, adiposity (BMI >30), Downs syndrome, history of cardiovascular diseases, chronic lung disease, chronic renal disease, psychiatric diseases, diabetes mellitus, malignant or hemic diseases or immunodeficiency [14]. eGFR was estimated using Chronic Kidney Disease Epidemiology Collaboration (CKD-EPI) equation [27]. Peripheral oxygen saturation was determined on a finger, using a pulse oximeter. ACE = angiotensin converting enzyme. BMI = body mass index. CVD = cardiovascular disease. eGFR = estimated glomerular filtration rate.

**Table 2: Viral load before sample acquisition using Naso Oropharyngeal swabs**

| <b>Patient</b> | <b>Initial CT values</b><br>( <i>E-Gene/S-Gene/RdRP-Gene/N-Gene; VOC-Analyses*</i> ) | <b>Deep Sequencing</b> | <b>Mutations identified in spike domains</b>                                                                                                                |
|----------------|--------------------------------------------------------------------------------------|------------------------|-------------------------------------------------------------------------------------------------------------------------------------------------------------|
| P1             | 13/ - /17/15                                                                         | B.1.389                | <b>D614G</b> , T723I                                                                                                                                        |
| P2             | 14/ - /16/17                                                                         | B.1.1.70               | <b>D614G</b>                                                                                                                                                |
| P3             | 13/ - /14/15                                                                         | B.1.1.70               | <b>D614G</b>                                                                                                                                                |
| P4             | 16/ - /17/20                                                                         | B.1.1.70               | <b>D614G</b>                                                                                                                                                |
| P5             | 12/ - /13/14                                                                         | B.1.221                | S98F, <b>D614G</b>                                                                                                                                          |
| P6             | 17/ - /18/16                                                                         | B.1.177.7              | A222V, <b>D614G</b>                                                                                                                                         |
| P7             | 21/ - /22/19                                                                         | B.1.177                | A222V, <b>D614G</b> , A1020V                                                                                                                                |
| P8             | 16/ - /16/18                                                                         | B.1.221                | S98F, L141LF, <b>D614G</b>                                                                                                                                  |
| P9             | - /16/16/14                                                                          | B.1.177                | A222V, <b>D614G</b>                                                                                                                                         |
| P10            | - /12/13/13                                                                          | B.1.1.153              | <b>D614G</b>                                                                                                                                                |
| P11            | - /24/25/23; VOC B1.351*                                                             | B.1.351                | H69Y, <b>D80A</b> , <b>D215G</b> , del242-244, <b>K417KT</b> , <b>E484EK</b> ,<br><b>N501NY</b> , <b>D614G</b> , A701V                                      |
| P12            | - /24/23/32; VOC B1.1.7*                                                             | - #                    | - #                                                                                                                                                         |
| P13            | - /17/16/25; VOC B1.1.7*                                                             | B.1.1.7                | <b>del144</b> , <b>N501NY</b> , <b>A570D</b> , <b>D614G</b> , <b>P681H</b> , A694AS, <b>T716I</b> ,<br><b>S982A</b> , <b>D1118H</b>                         |
| P14            | - /13/12/21; VOC B1.1.7*                                                             | B.1.1.7                | <b>del69-70</b> , S98F, D138DH, H245Y, <b>N501NY</b> , <b>A570D</b> , <b>D614G</b> ,<br><b>P681H</b> , A694AS, <b>T716I</b> , <b>S982A</b> , <b>D1118DH</b> |
| P15            | - /21/20/29; VOC B1.1.7*                                                             | B.1.1.7                | <b>del69-70</b> , <b>del144</b> , <b>N501Y</b> , <b>A570D</b> , <b>D614G</b> , <b>P681H</b> , A694AS,<br><b>T716I</b> , <b>S982A</b> , <b>D1118H</b>        |

Data is presented as individual data. Lineage of deep sequencing is presented according to the pangolin tool [13]. CT = cycle threshold resulting from RT-PCR performed at St. Josef-Hospital Bochum. VoC = variants of concern. \*VoC-Analyses started in the midst of the study period in February 2020 and was performed via melting curve analysis.

#no sufficient material available. **bold:** characteristic mutations associated with VOC according to RKI [16].

396 **Figures**

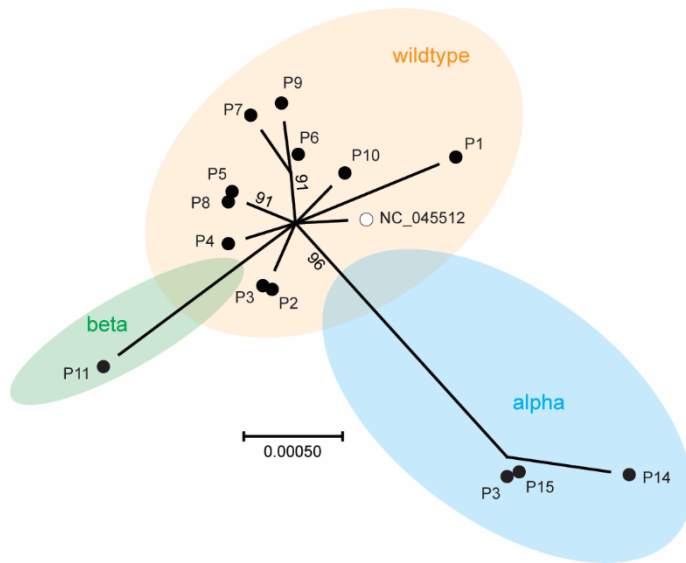

397

398 **Figure 1: Viral Isolates analyzed in this study.** Spike domains (nt) of 14 samples (black dots) and the  
399 SARS-CoV-2 reference genome NC\_045512 (open circle) were assembled using Clustal Omega at  
400 EMBL-EBI [28]. Phylogenetic analysis was conducted with “One click” at Phylogeny.fr [29] and tree  
401 was visualized with MEGA X [30]. Scale bar indicates the number of changes per site in maximum  
402 likelihood inference (HKY85 substitution model); numbers at branches represent bootstrap values (1000  
403 repetitions; cut-off  $\geq 70\%$ ).

404

405

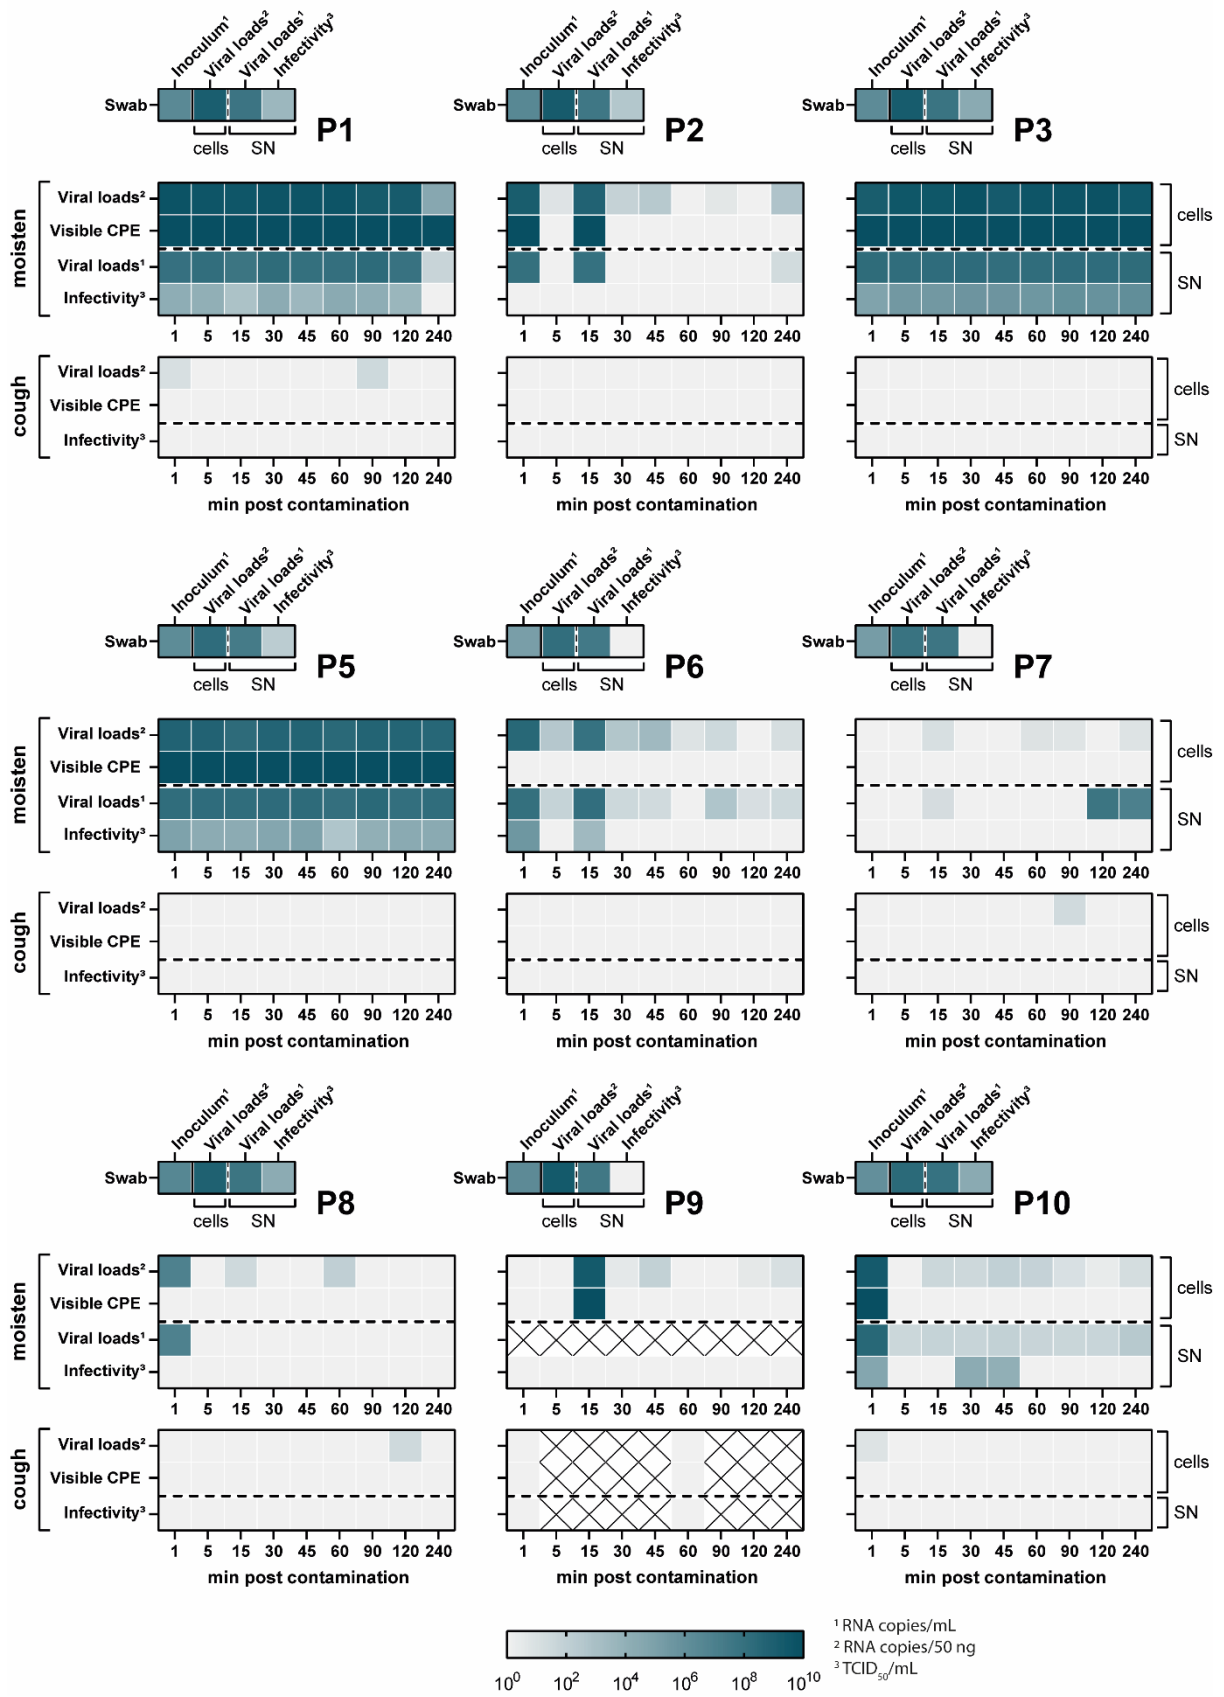

406

407 **Figure 2: Quantification of viral loads and infectivity of patient swabs, “moisten” samples and**

408 **“cough” samples that could be successfully recovered in cell culture. VeroE6 cells were inoculated**

409 **with the patient material and monitored on a daily basis. Upon the emergence of cytopathic effects, the**

410 supernatant was collected to determine viral loads by RT-qPCR (RNA copies/mL; indicated by <sup>1</sup>) and  
411 viral titers by an endpoint-dilution assay (TCID<sub>50</sub>/mL, indicated by <sup>3</sup>). Additionally, RNA was isolated  
412 from the cells and subjected to RT-qPCR to determine viral loads (RNA copies/50 ng total RNA,  
413 indicated by <sup>2</sup>). For each patient (P1-P10), three panels were designed. The top small panel includes  
414 exclusively data regarding the patient swabs, while the larger middle panel shows the data for the  
415 “moisten” samples and the lower panel the data collected from the “cough” samples. For “moisten” and  
416 “cough” samples viral loads and infectivity at nine different time points were determined. The color  
417 indicates the amount of virus being detectable in each sample, with light grey being the lower limit of  
418 detection to dark blue resulting in 10<sup>10</sup> RNA copies/mL, RNA copies/50 ng or TCID<sub>50</sub>/mL. The visible  
419 CPE was rated two dimensionally, with light grey being “no visible CPE” and dark green being “visible  
420 CPE”.
